# Supplementary material for: P16 methylation increases the sensitivity of cancer cells to the CDK4/6 inhibitor palbociclib
Source: PubMed Central journal article supplement (PMC6814222; doi:10.1371/journal.pone.0223084), 2019-10-25

**Figure 1c**

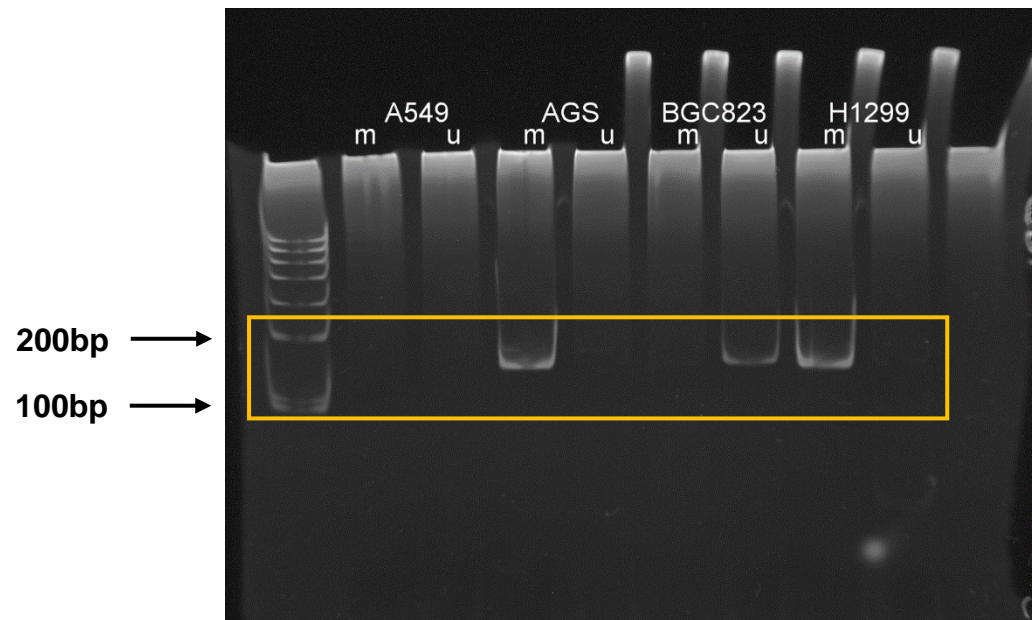

**Figure 1c**

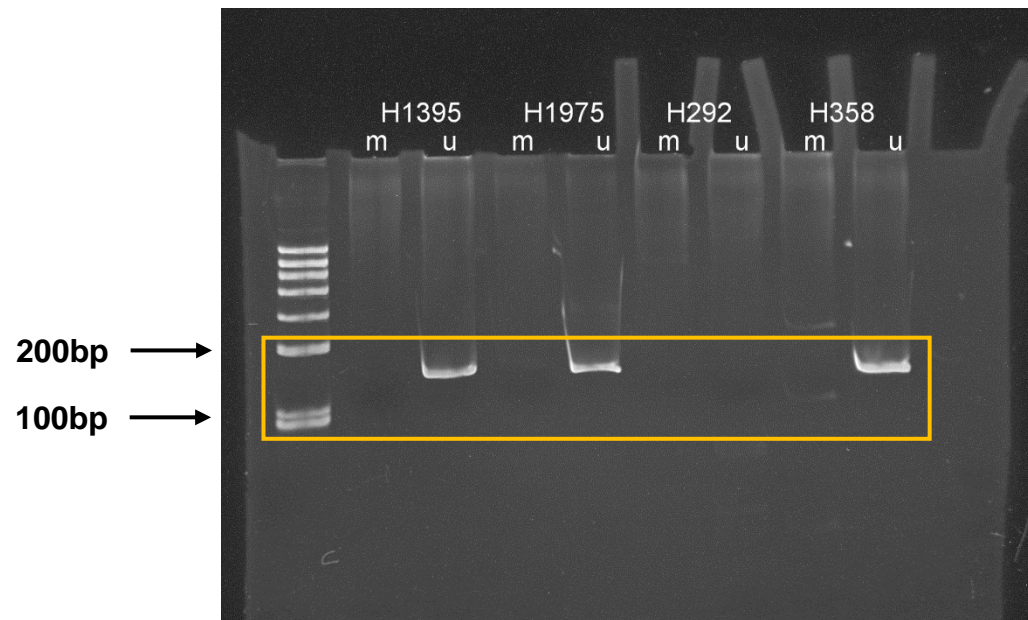

**Figure 1c**

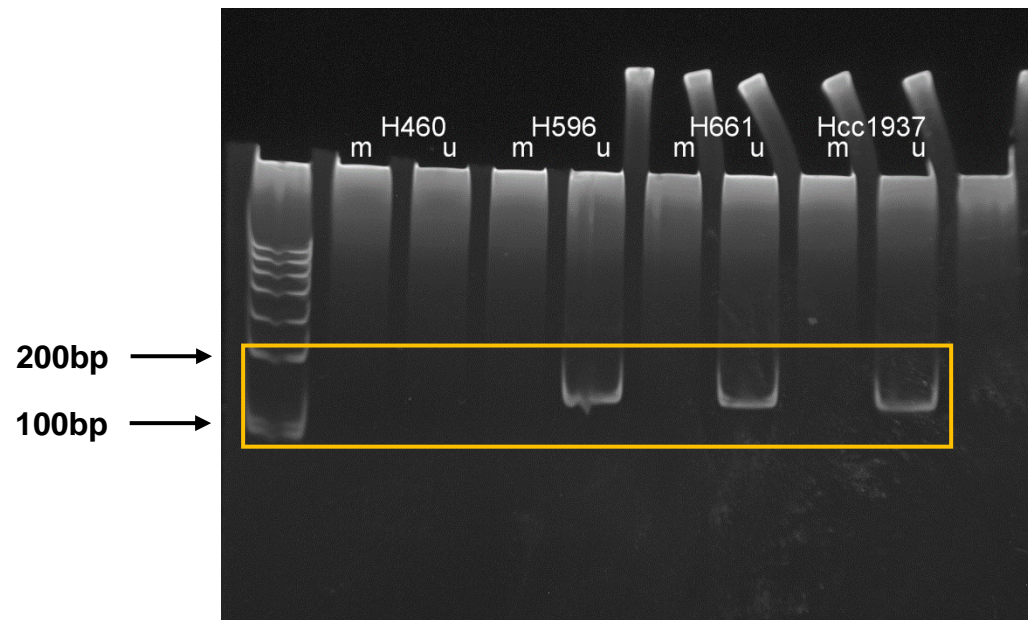

**Figure 1c**

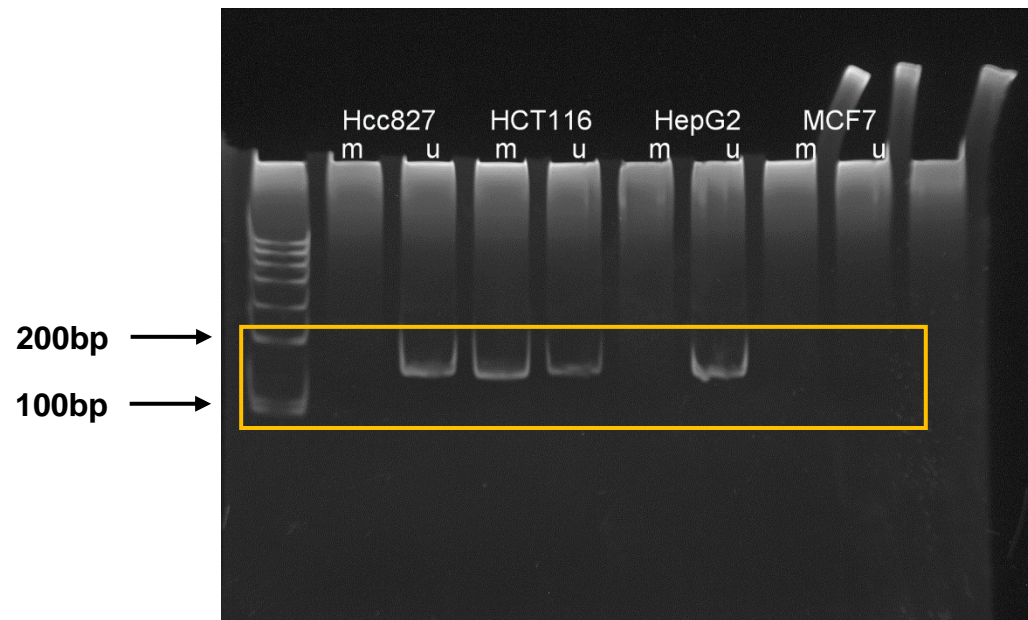

**Figure 1c**

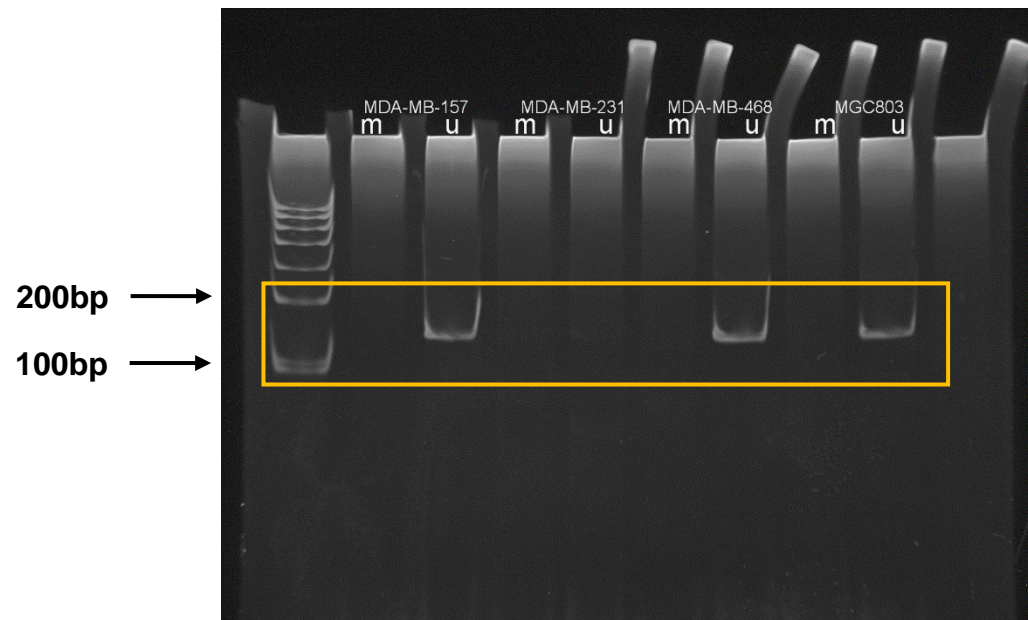

**Figure 1c**

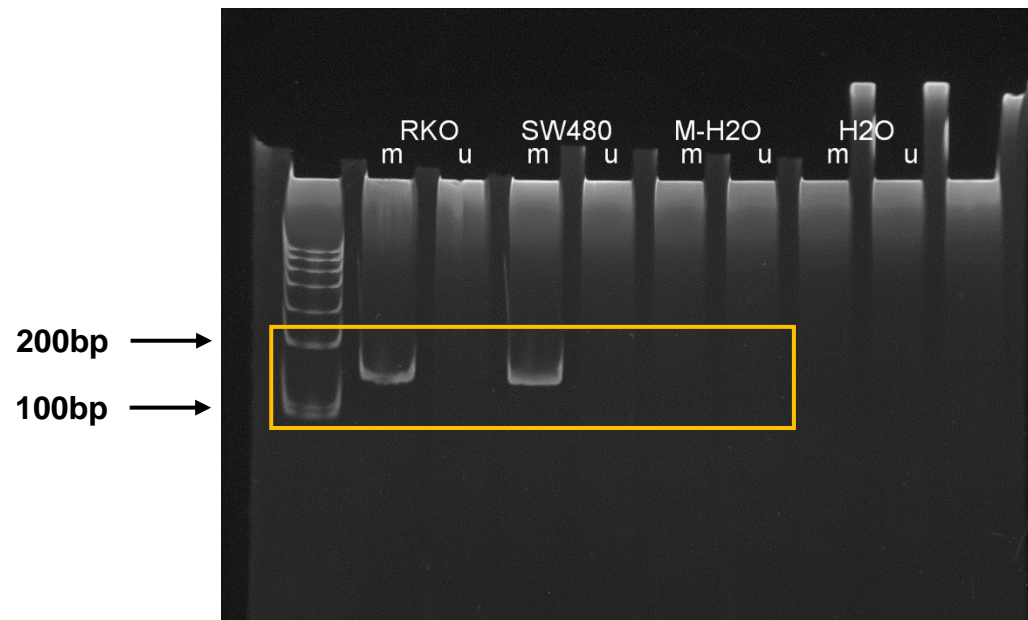



Figure 2a

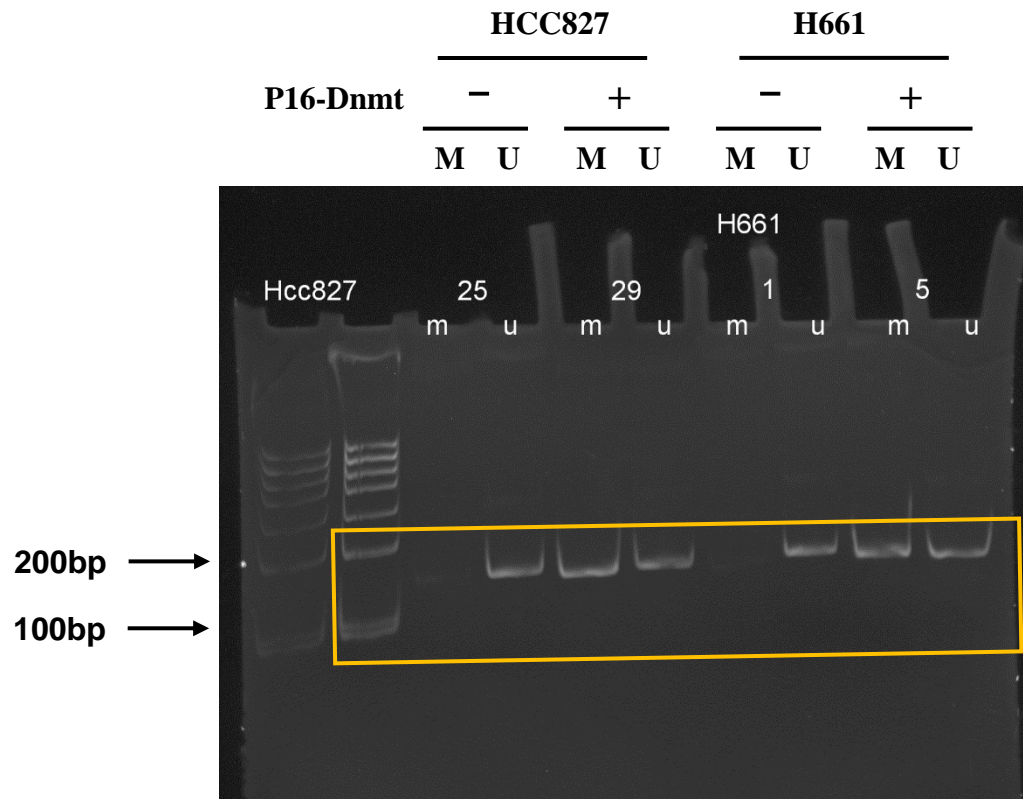

Figure 2a

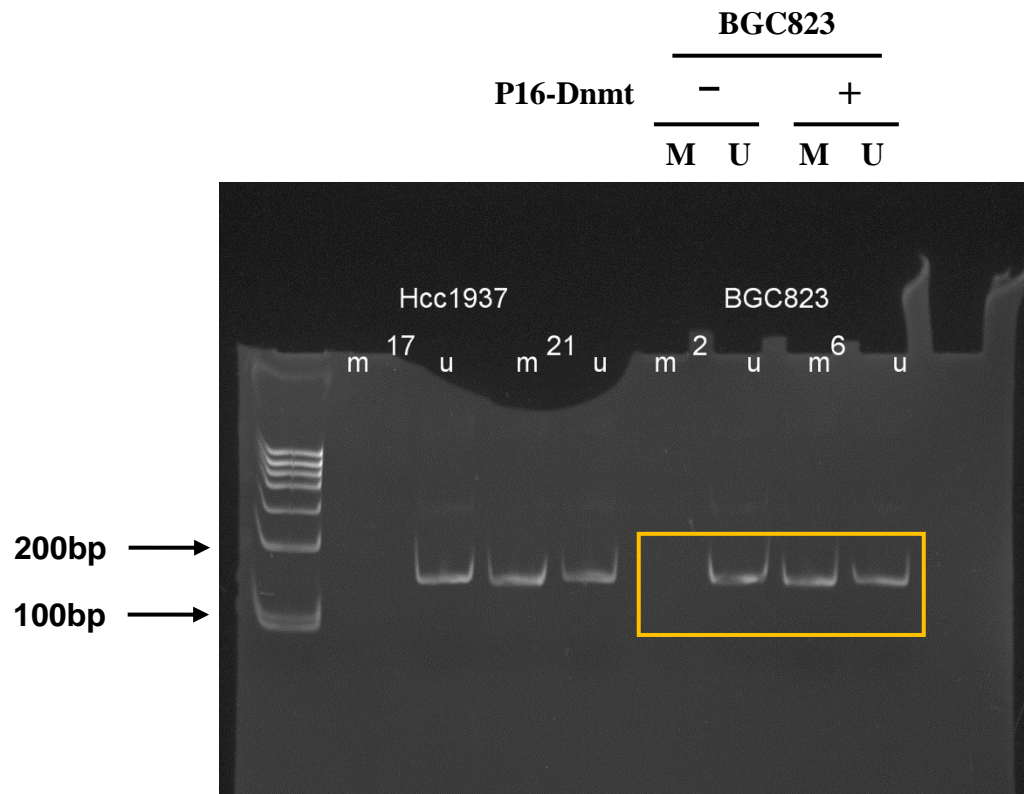



**Figure 2a**

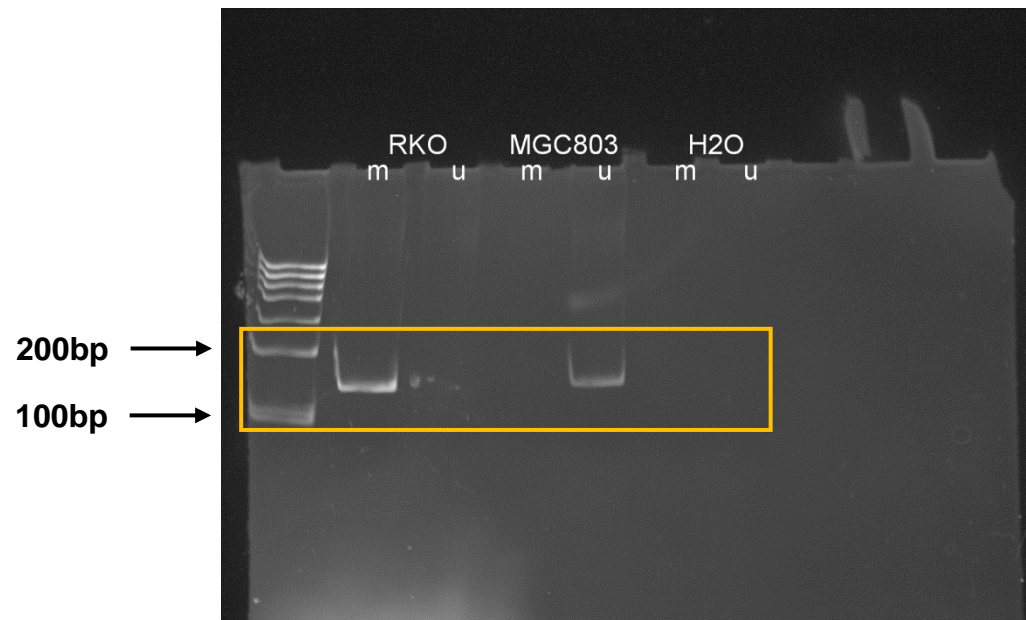





**Figure 4d**

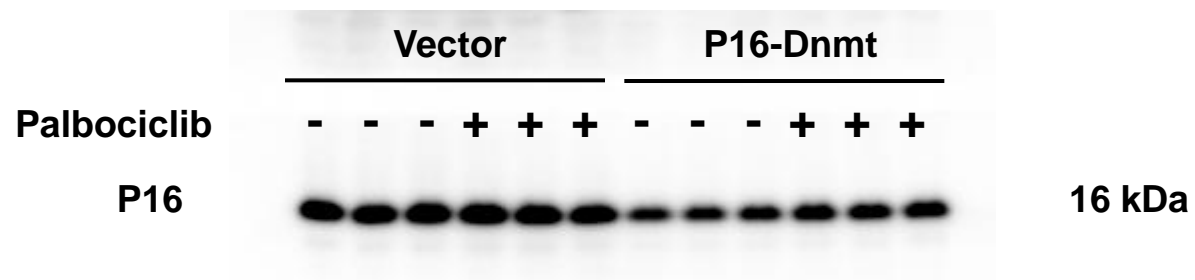

**Figure 4d**

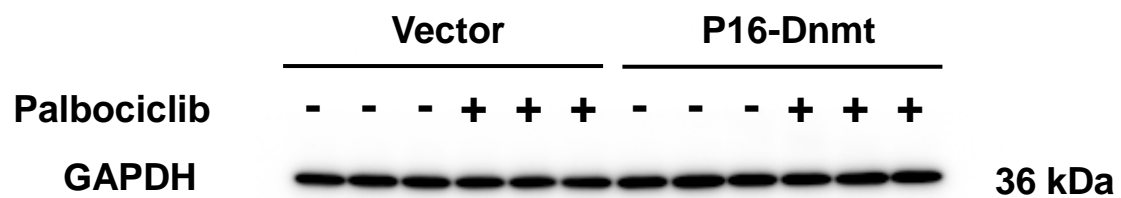

Supplement: pone.0223084.s003.pdf [file pone.0223084.s003.pdf]
